# Supplementary material for: Ultra-Processed Food Consumption and Adult Diabetes Risk: A Systematic Review and Dose-Response Meta-Analysis
Source: MDPI journal article supplement (doi:10.3390/nu13124410), 2021-12-09
Supplement: s1 [file s1]

**Supplementary Table S1.** Description of population, intervention, comparator and outcome (PICO).

|                     |                                                        |
|---------------------|--------------------------------------------------------|
| <b>Population</b>   | Adults ( $\geq 18$ years)                              |
| <b>Intervention</b> | -                                                      |
| <b>Comparison</b>   | Ultra-processed Food Consumption (higher versus lower) |
| <b>Outcome</b>      | Diabetes Risk                                          |
