# Supplementary material for: Ultra-Processed Food Consumption and Adult Diabetes Risk: A Systematic Review and Dose-Response Meta-Analysis
Source: MDPI journal article supplement (doi:10.3390/nu13124410), 2021-12-09
Supplement: s1 [file s1]

**Supplementary Table S2.** Search strategies including the key terms and the queries for each database

| Database<br>10/8/2021     | key terms and the queries                                                                                                                                                                                                                                                                                                                                                                                                                                                                                                                                                                                                                                                                                                              |
|---------------------------|----------------------------------------------------------------------------------------------------------------------------------------------------------------------------------------------------------------------------------------------------------------------------------------------------------------------------------------------------------------------------------------------------------------------------------------------------------------------------------------------------------------------------------------------------------------------------------------------------------------------------------------------------------------------------------------------------------------------------------------|
| PubMed<br>(n=1477)        | <p>#1 "fast foods"[All Fields] OR "fast foods"[MeSH Terms] OR "ultra processed food*"[All Fields] OR "ultraprocessed food*"[All Fields] OR "ultra processed food*"[All Fields] OR "processed food*"[All Fields] OR "ultra-processed"[All Fields] OR "ultraprocessed"[All Fields] OR "ultra-processed"[All Fields] OR "NOVA"[All Fields] OR "nova food classif*"[All Fields] OR "nova food*"[All Fields] OR "nova food classif*"[All Fields] OR "NOVA food classification system"[All Fields]</p> <p>#2 "Diabetes Mellitus"[MeSH Terms] OR "diabetes mellitus, type 2"[MeSH Terms] OR "Diabetes Mellitus"[All Fields] OR "diabetes"[All Fields] OR "T2DM"[All Fields] OR "type 2 diabetes mellitus"[All Fields]</p> <p>#3 #1 AND #2</p> |
| Web of Science<br>(n=536) | <p>#1 TOPIC: ("ultra-processed food*") OR TOPIC: ("ultraprocessed food*") OR TOPIC: ("ultra processed food*") OR TOPIC: ("processed food*") OR TOPIC: ("ultra processed") OR TOPIC: ("ultraprocessed") OR TOPIC: ("ultra-processed") OR TOPIC: ("NOVA") OR TOPIC: ("NOVA food classif*") OR TOPIC: ("NOVA food*") OR TOPIC: ("NOVA food classif*") OR TOPIC: ("NOVA food classification system") OR TOPIC: ("fast foods")</p> <p>#2 TOPIC: ("Diabetes Mellitus") OR TOPIC: ("diabetes") OR TOPIC: ("T2DM") OR TOPIC: ("type 2 diabetes mellitus")</p> <p>#3 #1 AND #2</p>                                                                                                                                                              |
| Scopus<br>(n=2321)        | <p>#1 ( TITLE-ABS-KEY ( "ultra-processed food*" ) OR TITLE-ABS-KEY ( "ultraprocessed food*" ) OR TITLE-ABS-KEY ( "ultra processed food*" ) OR TITLE-ABS-KEY ( "processed food*" ) OR TITLE-ABS-KEY ( "ultra processed" ) OR TITLE-ABS-KEY ( "ultraprocessed" ) OR TITLE-ABS-KEY ( "ultra-processed" ) OR TITLE-ABS-KEY ( "NOVA" ) OR TITLE-ABS-KEY ( "NOVA food classif*" ) OR TITLE-ABS-KEY ( "NOVA food*" ) OR TITLE-ABS-KEY ( "NOVA food classif*" ) OR TITLE-ABS-KEY ( "NOVA food classification system" ) OR TITLE-ABS-KEY ( "fast foods" ) )</p> <p>#2 TITLE-ABS-KEY ( "Diabetes Mellitus" ) OR TITLE-ABS-KEY ( "diabetes" ) OR TITLE-ABS-KEY ( "T2DM" ) OR TITLE-ABS-KEY ( "type 2 diabetes mellitus" )</p> <p>#3 #1 AND #2</p> |
